# Supplementary material for: A Machine Learning Approach for Detecting Idiopathic REM Sleep Behavior Disorder
Source: MDPI journal article supplement (doi:10.3390/diagnostics12112689), 2022-11-04
Supplement: s1 [file s1]

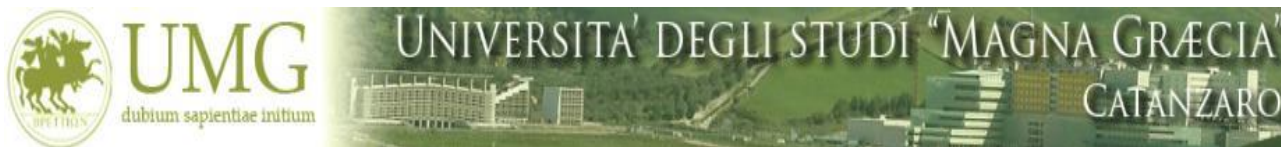

**CENTRO DI RICERCHE NEUROSCIENZE**  
**UNITA' DI RICERCA NEUROIMMAGINI CNR**  
**RESPONSABILE: PROF. ALDO QUATTRONE**

**Consenso Informato**

**“Identificazione e validazione di nuovi biomarcatori, basati su tecniche di Intelligenza Artificiale applicate alla Variabilità della Frequenza Cardiaca, per la diagnosi precoce del Disturbo del comportamento in Sonno REM (RBD)”**

**(copia per il paziente)**

Io sottoscritto/a (Nome e Cognome) \_\_\_\_\_

**Dichiaro** di aver ricevuto tutte le informazioni relative allo studio in oggetto, e di essere stato informato dal Prof. \_\_\_\_\_ sugli scopi dello studio, sulle modalità attraverso le quali verrà effettuato e di aver avuto modo di chiedere ogni delucidazione.

**Accetto volontariamente** di partecipare allo studio sopraindicato.

**Dichiaro** altresì che mi sono state date tutte le informazioni necessarie per la comprensione del progetto a cui parteciperò.

Data \_\_\_\_\_ Firma \_\_\_\_\_

- Dichiaro di aver ottenuto il consenso alla partecipazione allo studio del paziente/soggetto in ottemperanza alle disposizioni vigenti, alle norme di Buona Pratica Clinica ed ai principi della Dichiarazione di Helsinki e successive integrazioni e confermo di aver informato il soggetto secondo i contenuti prescritti dalle normative e secondo quanto stabilito nel protocollo sperimentale.

Nome e Cognome di chi ha informato la persona \_\_\_\_\_

Data \_\_\_\_\_ Firma di chi ha informato la persona \_\_\_\_\_

## Consenso Informato

### Studio

**“Identificazione e validazione di nuovi biomarcatori, basati su tecniche di Intelligenza Artificiale applicate alla Variabilità della Frequenza Cardiaca, per la diagnosi precoce del Disturbo del comportamento in Sonno REM (RBD)”**

**(copia per il ricercatore)**

Io sottoscritto/a (Nome e Cognome) \_\_\_\_\_

**Dichiaro** di aver ricevuto tutte le informazioni relative allo studio in oggetto, e di essere stato informato dal Prof. \_\_\_\_\_ sugli scopi dello studio, sulle modalità attraverso le quali verrà effettuato e di aver avuto modo di chiedere ogni delucidazione.

**Accetto volontariamente** di partecipare allo studio sopraindicato.

**Dichiaro** altresì che mi sono state date tutte le informazioni necessarie per la comprensione del progetto a cui parteciperò.

Data \_\_\_\_\_ Firma \_\_\_\_\_

- Dichiaro di aver ottenuto il consenso alla partecipazione allo studio del paziente/soggetto in ottemperanza alle disposizioni vigenti, alle norme di Buona Pratica Clinica ed ai principi della Dichiarazione di Helsinki e successive integrazioni e confermo di aver informato il soggetto secondo i contenuti prescritti dalle normative e secondo quanto stabilito nel protocollo sperimentale.

Nome e Cognome di chi ha informato la persona \_\_\_\_\_

Data \_\_\_\_\_ Firma di chi ha informato la persona \_\_\_\_\_
