# Supplementary material for: A Machine Learning Approach for Detecting Idiopathic REM Sleep Behavior Disorder
Source: MDPI journal article supplement (doi:10.3390/diagnostics12112689), 2022-11-04
Supplement: s1 [file s1]

## Supplementary Material

**Table S1.** Hyperparameters tuning of Random Forest and eXtreme Gradient Boosting models

| Model   | Hyperparameters        | definition                                                       |
|---------|------------------------|------------------------------------------------------------------|
| RF      | Mtry = 2               | Number of variables randomly sampled as candidates at each split |
|         | Nrounds = 3100         | Maximum number of iterations/trees to grow                       |
| XGBoost | Max.depth = 2          | Depth of the tree                                                |
|         | Eta = 0.1              | Learning rate                                                    |
|         | Gamma = 0.05           | Regularisation (preventing overfitting)                          |
|         | Col.sample_by_tree=0.8 | Controls the number of features supplied to a tree               |
|         | Child_weight = 1       | Leaf threshold for stopping tree splitting                       |
|         | Subsample = 0.5        | Controls the number of samples supplied to a tree                |

RF: Random Forest; XGBoost: eXtreme Gradient Boosting.

Tuning of Hyperparameters for ML models is further described in the attached R code.
