# Supplementary material for: A Machine Learning Approach for Detecting Idiopathic REM Sleep Behavior Disorder
Source: MDPI journal article supplement (doi:10.3390/diagnostics12112689), 2022-11-04
Supplement: s1 [file s1]

| Section/Topic                | Item | Checklist Item                                                                                                                                                                                                                                                                                                                                                                                                                                                                                                                                                                                                                                                                                                                                                                                                                                                                                                                                                                                                                                                                                                                                                                                                                                                                                                                                                                                                                                                                                                                                                                                                                                                                                                                                                                                                                                                                                              | Page |
|------------------------------|------|-------------------------------------------------------------------------------------------------------------------------------------------------------------------------------------------------------------------------------------------------------------------------------------------------------------------------------------------------------------------------------------------------------------------------------------------------------------------------------------------------------------------------------------------------------------------------------------------------------------------------------------------------------------------------------------------------------------------------------------------------------------------------------------------------------------------------------------------------------------------------------------------------------------------------------------------------------------------------------------------------------------------------------------------------------------------------------------------------------------------------------------------------------------------------------------------------------------------------------------------------------------------------------------------------------------------------------------------------------------------------------------------------------------------------------------------------------------------------------------------------------------------------------------------------------------------------------------------------------------------------------------------------------------------------------------------------------------------------------------------------------------------------------------------------------------------------------------------------------------------------------------------------------------|------|
| <b>Title and abstract</b>    |      |                                                                                                                                                                                                                                                                                                                                                                                                                                                                                                                                                                                                                                                                                                                                                                                                                                                                                                                                                                                                                                                                                                                                                                                                                                                                                                                                                                                                                                                                                                                                                                                                                                                                                                                                                                                                                                                                                                             |      |
| Title                        | 1    | A machine learning approach for detecting idiopathic REM Sleep Behaviour Disorder: a pilot study.                                                                                                                                                                                                                                                                                                                                                                                                                                                                                                                                                                                                                                                                                                                                                                                                                                                                                                                                                                                                                                                                                                                                                                                                                                                                                                                                                                                                                                                                                                                                                                                                                                                                                                                                                                                                           | 1    |
| Abstract                     | 2    | Background and purpose: Growing evidence suggests that Machine Learning (ML) models can assist the diagnosis of neurological disorders. However, little is still known about the potential application of ML in diagnosing of idiopathic REM sleep behaviour disorder (iRBD), a parasomnia characterized by a high risk of phenoconversion to synucleinopathies. This study aimed to develop a model using ML algorithms to identify iRBD patients and test its accuracy. Methods: Data were acquired from 32 participants (20 iRBD patients and 12 controls). All subjects underwent a video-polysomnography. In all subjects, we measured the components of heart rate variability (HRV) during 24-hour recordings and calculated night-to-day ratios (cardiac autonomic indices). Discriminating performances of single HRV features were assessed. ML models based on Logistic Regression (LR), Random Forest (RF) and eXtreme Gradient Boosting (XGBoost) were trained on HRV-data. The utility of HRV features and ML models for detecting iRBD was evaluated by area under the ROC curve (AUC), sensitivity, specificity and accuracy corresponding to optimal models. Results: Cardiac autonomic indices had low performances (accuracy 63-69%) in distinguishing iRBD from control subjects. By contrast, RF model performed the best, with excellent accuracy (94%), sensitivity (95%) and specificity (92%), while XGBoost showed accuracy 91%, specificity 83% and sensitivity 95%. Mean triangular index during wake (Tlw) was the best discriminating feature between iRBD and HC with 81% accuracy, reaching a 84% accuracy when combined with VLF power during sleep using a LR model. Conclusions: our findings demonstrated that ML algorithms can accurately identify iRBD patients. Our model could be used in clinical practice to facilitate the early detection of this form of RBD. | 1    |
| <b>Introduction</b>          |      |                                                                                                                                                                                                                                                                                                                                                                                                                                                                                                                                                                                                                                                                                                                                                                                                                                                                                                                                                                                                                                                                                                                                                                                                                                                                                                                                                                                                                                                                                                                                                                                                                                                                                                                                                                                                                                                                                                             |      |
| Background and objectives    | 3a   | Idiopathic RBD (iRBD), and RBD in general, is currently diagnosed by means of polysomnography, which is expensive and may disturb the subject's sleep. The RBD1Q questionnaire has been introduced as a screening tool, with high sensitivity (94%) and moderate specificity (87%). At present, no study has ever tried to identify iRBD using a Machine Learning (ML) approach on Heart Rate Variability (HRV) data.                                                                                                                                                                                                                                                                                                                                                                                                                                                                                                                                                                                                                                                                                                                                                                                                                                                                                                                                                                                                                                                                                                                                                                                                                                                                                                                                                                                                                                                                                       | 2,3  |
|                              | 3b   | This study aims at developing ML models for the identification of iRBD using HRV.                                                                                                                                                                                                                                                                                                                                                                                                                                                                                                                                                                                                                                                                                                                                                                                                                                                                                                                                                                                                                                                                                                                                                                                                                                                                                                                                                                                                                                                                                                                                                                                                                                                                                                                                                                                                                           | 3    |
| <b>Methods</b>               |      |                                                                                                                                                                                                                                                                                                                                                                                                                                                                                                                                                                                                                                                                                                                                                                                                                                                                                                                                                                                                                                                                                                                                                                                                                                                                                                                                                                                                                                                                                                                                                                                                                                                                                                                                                                                                                                                                                                             |      |
| Source of data               | 4a   | Twenty patients with a clinical diagnosis of idiopathic RBD and twelve healthy, sex- and age-matched subjects (HC) were enrolled in this study                                                                                                                                                                                                                                                                                                                                                                                                                                                                                                                                                                                                                                                                                                                                                                                                                                                                                                                                                                                                                                                                                                                                                                                                                                                                                                                                                                                                                                                                                                                                                                                                                                                                                                                                                              | 3    |
|                              | 4b   | Start of enrollment: 01 Jan 2021<br>End: 31 Mar 2022                                                                                                                                                                                                                                                                                                                                                                                                                                                                                                                                                                                                                                                                                                                                                                                                                                                                                                                                                                                                                                                                                                                                                                                                                                                                                                                                                                                                                                                                                                                                                                                                                                                                                                                                                                                                                                                        |      |
| Participants                 | 5a   | Secondary care unit, Neurosciences Research Centre, catanzaro, Italy.                                                                                                                                                                                                                                                                                                                                                                                                                                                                                                                                                                                                                                                                                                                                                                                                                                                                                                                                                                                                                                                                                                                                                                                                                                                                                                                                                                                                                                                                                                                                                                                                                                                                                                                                                                                                                                       | 3    |
|                              | 5b   | iRBD: subjects reporting dream enactment (or reported by partners), with no other co-morbidities<br>Healthy Controls: no history of neurological disorders.                                                                                                                                                                                                                                                                                                                                                                                                                                                                                                                                                                                                                                                                                                                                                                                                                                                                                                                                                                                                                                                                                                                                                                                                                                                                                                                                                                                                                                                                                                                                                                                                                                                                                                                                                 | 3    |
|                              | 5c   | Medications modifying sleep architecture or autonomous nervous system activity were considered as exclusion criteria.                                                                                                                                                                                                                                                                                                                                                                                                                                                                                                                                                                                                                                                                                                                                                                                                                                                                                                                                                                                                                                                                                                                                                                                                                                                                                                                                                                                                                                                                                                                                                                                                                                                                                                                                                                                       | 3    |
| Outcome                      | 6a   | Presence/absence of iRBD.                                                                                                                                                                                                                                                                                                                                                                                                                                                                                                                                                                                                                                                                                                                                                                                                                                                                                                                                                                                                                                                                                                                                                                                                                                                                                                                                                                                                                                                                                                                                                                                                                                                                                                                                                                                                                                                                                   | 4    |
|                              | 6b   | NA. Outcome has to be compared to target data.                                                                                                                                                                                                                                                                                                                                                                                                                                                                                                                                                                                                                                                                                                                                                                                                                                                                                                                                                                                                                                                                                                                                                                                                                                                                                                                                                                                                                                                                                                                                                                                                                                                                                                                                                                                                                                                              | 4    |
| Predictors                   | 7a   | HRV features, measured on adjacent 5-mins segments and averaged over sleep and wake periods                                                                                                                                                                                                                                                                                                                                                                                                                                                                                                                                                                                                                                                                                                                                                                                                                                                                                                                                                                                                                                                                                                                                                                                                                                                                                                                                                                                                                                                                                                                                                                                                                                                                                                                                                                                                                 | 3-4  |
|                              | 7b   | NA. Predictors have been chosen according to importance measures.                                                                                                                                                                                                                                                                                                                                                                                                                                                                                                                                                                                                                                                                                                                                                                                                                                                                                                                                                                                                                                                                                                                                                                                                                                                                                                                                                                                                                                                                                                                                                                                                                                                                                                                                                                                                                                           | 4    |
| Sample size                  | 8    | Power analysis, considering a large effect (Cohen's d=1.2). Initial calculations with n1=20 iRBD subjects suggested a number n2=8 HC subjects. Actual effect size of most important feature (Tlw) was even larger (d=2.03).                                                                                                                                                                                                                                                                                                                                                                                                                                                                                                                                                                                                                                                                                                                                                                                                                                                                                                                                                                                                                                                                                                                                                                                                                                                                                                                                                                                                                                                                                                                                                                                                                                                                                 |      |
| Missing data                 | 9    | No missing data.                                                                                                                                                                                                                                                                                                                                                                                                                                                                                                                                                                                                                                                                                                                                                                                                                                                                                                                                                                                                                                                                                                                                                                                                                                                                                                                                                                                                                                                                                                                                                                                                                                                                                                                                                                                                                                                                                            |      |
| Statistical analysis methods | 10a  | AUCs and permutation importance of predictors were evaluated                                                                                                                                                                                                                                                                                                                                                                                                                                                                                                                                                                                                                                                                                                                                                                                                                                                                                                                                                                                                                                                                                                                                                                                                                                                                                                                                                                                                                                                                                                                                                                                                                                                                                                                                                                                                                                                | 4    |
|                              | 10b  | Single feature (mean wake triangular index), Logistic Regression, Random Forest and extreme gradient boosting, using Leave-One-Out cross validation.                                                                                                                                                                                                                                                                                                                                                                                                                                                                                                                                                                                                                                                                                                                                                                                                                                                                                                                                                                                                                                                                                                                                                                                                                                                                                                                                                                                                                                                                                                                                                                                                                                                                                                                                                        | 4    |
|                              | 10d  | Accuracy, sensitivity, specificity, AUC                                                                                                                                                                                                                                                                                                                                                                                                                                                                                                                                                                                                                                                                                                                                                                                                                                                                                                                                                                                                                                                                                                                                                                                                                                                                                                                                                                                                                                                                                                                                                                                                                                                                                                                                                                                                                                                                     | 4    |
| Risk groups                  | 11   | No risk groups.                                                                                                                                                                                                                                                                                                                                                                                                                                                                                                                                                                                                                                                                                                                                                                                                                                                                                                                                                                                                                                                                                                                                                                                                                                                                                                                                                                                                                                                                                                                                                                                                                                                                                                                                                                                                                                                                                             |      |
| <b>Results</b>               |      |                                                                                                                                                                                                                                                                                                                                                                                                                                                                                                                                                                                                                                                                                                                                                                                                                                                                                                                                                                                                                                                                                                                                                                                                                                                                                                                                                                                                                                                                                                                                                                                                                                                                                                                                                                                                                                                                                                             |      |
| Participants                 | 13a  | Participants underwent a single polysomnographic examination with EEG, EMG, EOG and ECG recordings.                                                                                                                                                                                                                                                                                                                                                                                                                                                                                                                                                                                                                                                                                                                                                                                                                                                                                                                                                                                                                                                                                                                                                                                                                                                                                                                                                                                                                                                                                                                                                                                                                                                                                                                                                                                                         | 3    |
|                              | 13b  | As described in the Methods section.                                                                                                                                                                                                                                                                                                                                                                                                                                                                                                                                                                                                                                                                                                                                                                                                                                                                                                                                                                                                                                                                                                                                                                                                                                                                                                                                                                                                                                                                                                                                                                                                                                                                                                                                                                                                                                                                        | 3    |
| Model development            | 14a  | 20 subjects: outcome = 1<br>12 subjects: outcome = 0.                                                                                                                                                                                                                                                                                                                                                                                                                                                                                                                                                                                                                                                                                                                                                                                                                                                                                                                                                                                                                                                                                                                                                                                                                                                                                                                                                                                                                                                                                                                                                                                                                                                                                                                                                                                                                                                       | 3    |
|                              | 14b  | NA                                                                                                                                                                                                                                                                                                                                                                                                                                                                                                                                                                                                                                                                                                                                                                                                                                                                                                                                                                                                                                                                                                                                                                                                                                                                                                                                                                                                                                                                                                                                                                                                                                                                                                                                                                                                                                                                                                          |      |

## TRIPOD Checklist: Prediction Model Development

|                           |     |                                                                                                                                                                                                                                                                                                                                          |     |
|---------------------------|-----|------------------------------------------------------------------------------------------------------------------------------------------------------------------------------------------------------------------------------------------------------------------------------------------------------------------------------------------|-----|
| Model specification       | 15a | Models are included in the Supplementary Material.                                                                                                                                                                                                                                                                                       |     |
|                           | 15b | Prediction models are used as objects in R code, after evaluating new data/predictors from HRV data.                                                                                                                                                                                                                                     |     |
| Model performance         | 16  | Mean wake Triangular Index: accuracy = 0.81 (0.64-0.93)<br>Logistic Regression: accuracy = 0.84 (0.67-0.95)<br>Random Forest: accuracy = 0.94 (0.79-0.99)<br>XGBoost: accuracy = 0.91 (0.75-0.98)                                                                                                                                        | 7   |
| <b>Discussion</b>         |     |                                                                                                                                                                                                                                                                                                                                          |     |
| Limitations               | 18  | The sample is small, though sufficient according to effect size calculations. For the validation of ML models a larger sample (from different ethnic populations) will be necessary, in order to introduce them into clinical practice.                                                                                                  | 8   |
| Interpretation            | 19b | No other studies tried to identify iRBD using ML models on HRV features. As HRV features can also be obtained far easily from photoplethysmographic (PPG) recordings, further investigation will be addressed to replicating these results on PPG HRV data.                                                                              | 8   |
| Implications              | 20  | Our proposed ML models allowed a correct identification of iRBD. Moreover, the artificial intelligence models have been trained on HRV features, simple and non-invasive measures that make this of particular practical value since it may be a valid help for the screening of patients suspected of having iRBD in large populations. | 8-9 |
| <b>Other information</b>  |     |                                                                                                                                                                                                                                                                                                                                          |     |
| Supplementary information | 21  | Trained ML models and R scripts are available in the Supplementary Material. Data are available upon reasonable request to the corresponding Author.                                                                                                                                                                                     |     |
| Funding                   | 22  | No external funding has been received for this work.                                                                                                                                                                                                                                                                                     |     |

We recommend using the TRIPOD Checklist in conjunction with the TRIPOD Explanation and Elaboration document.
